# Supplementary material
Source: publisher figshare collection journal article supplement (https://gsapubs.figshare.com/ndownloader/files/38882937)
Supplement: Supplementary file 1 [file 38882937]

## Sheet: Sheet1
Complete 40Ar/39Ar data
	Sample:	EXP2_2542			Identifier:	UW153:E65
	Material:	Plagioclase
														Corrected1
	N	Power	Age	±1σ	K/Ca	±1σ	%40Ar	40Ar*/39ArK	±1σ	39Ar/40Ar	±1σ	36Ar/40Ar	±1σ	40Ar	±1σ	39Ar	±1σ	38Ar	±1σ	37Ar	±1σ	36Ar	±1σ	J	±1σ	39Ar Decay	37Ar Decay	LambdaK	MonitorAge	MonitorName	MonitorMaterial	(40Ar/3939)K	±1σ	(38Ar/3939)K	±1σ	(37Ar/3939)K	±1σ	(39Ar/3737)Ca	±1σ	(38Ar/3737)Ca	±1σ	(36Ar/3737)Ca	±1σ	(36Ar/3838)Cl	Ca/K	Cl/K
		%	(ka)	(ka)			(%)							(cps)		(cps)		(cps)		(cps)		(cps)
X	01A	20	2932.41	191.54	0.159	0.004	75.4038	2.88372	0.188508	0.262	0.003	0.0008	0.0002	6045.9	60.16	1582.09	2.84092	24.9876	3.28615	176.843	4.91621	6.11211	0.976598	0.0005561	3e-07	1.00114	24.2475	5.464e-10	1.1864	ACS-2	sanidine	0.0054	0.00014	0.0121	2e-05	0	0	0.000702	1.2e-05	2e-05	1e-06	0.00027	0	263	2.32	0.227
	02A	20	2329.7	157.27	0.77	0.06	56.234	2.29064	0.154727	0.2458	0.0007	0.0015	0.0001	9480.43	22.3081	2325.65	3.34622	36.4278	3.06524	53.3894	4.19466	14.2067	1.20309	0.0005561	3e-07	1.00114	24.2549	5.464e-10	1.1864	ACS-2	sanidine	0.0054	0.00014	0.0121	2e-05	0	0	0.000702	1.2e-05	2e-05	1e-06	0.00027	0	263	2.32	0.227
	03A	20	2696	314.73	0.131	0.004	52.0815	2.65106	0.309716	0.1967	0.001	0.0016	0.0002	4614.9	19.5838	907.686	2.40241	8.85403	2.50116	123.357	4.15279	8.19818	0.93747	0.0005561	3e-07	1.00114	24.2622	5.464e-10	1.1864	ACS-2	sanidine	0.0054	0.00014	0.0121	2e-05	0	0	0.000702	1.2e-05	2e-05	1e-06	0.00027	0	263	2.32	0.227
X	04A	20	2967.49	294.63	0.144	0.008	58.2646	2.91824	0.289977	0.1999	0.0009	0.0014	0.0002	4997.09	17.7787	998.657	2.57126	7.02468	2.95743	122.923	7.16168	7.77204	0.965583	0.0005561	3e-07	1.00114	24.2798	5.464e-10	1.1864	ACS-2	sanidine	0.0054	0.00014	0.0121	2e-05	0	0	0.000702	1.2e-05	2e-05	1e-06	0.00027	0	263	2.32	0.227
X	06A	20	3272.47	283.58	0.15	0.007	83.4007	3.21843	0.279145	0.259	0.001	0.0006	0.0002	3843	18.0729	996.729	2.44944	14.6114	3.61711	117.987	5.80542	2.89369	0.927871	0.0005561	3e-07	1.00114	24.2945	5.464e-10	1.1864	ACS-2	sanidine	0.0054	0.00014	0.0121	2e-05	0	0	0.000702	1.2e-05	2e-05	1e-06	0.00027	0	263	2.32	0.227
X	08A	20	2954.96	143.83	0.18	0.006	78.038	2.90591	0.141553	0.2689	0.0008	0.0007	0.0001	7402.17	18.6996	1988.91	3.26872	24.8893	5.46784	195.217	6.72815	6.69178	0.93869	0.0005561	3e-07	1.00114	24.3194	5.464e-10	1.1864	ACS-2	sanidine	0.0054	0.00014	0.0121	2e-05	0	0	0.000702	1.2e-05	2e-05	1e-06	0.00027	0	263	2.32	0.227
	09A	20	2572.87	208.73	0.23	0.01	45.824	2.5299	0.205393	0.1813	0.0006	0.0018	0.0001	7608.56	18.821	1378.36	2.81419	16.7569	4.35701	105.589	6.2108	14.4748	0.944603	0.0005561	3e-07	1.00114	24.3268	5.464e-10	1.1864	ACS-2	sanidine	0.0054	0.00014	0.0121	2e-05	0	0	0.000702	1.2e-05	2e-05	1e-06	0.00027	0	263	2.32	0.227
X	10A	20	3137.27	240.8	0.23	0.01	78.5447	3.08535	0.23702	0.255	0.001	0.0007	0.0002	4590.11	17.8346	1168.71	2.56653	10.2538	2.7215	89.1067	5.68223	3.86236	0.924502	0.0005561	3e-07	1.00114	24.3445	5.464e-10	1.1864	ACS-2	sanidine	0.0054	0.00014	0.0121	2e-05	0	0	0.000702	1.2e-05	2e-05	1e-06	0.00027	0	263	2.32	0.227
	11A	20	2769.51	242.37	0.26	0.02	52.3769	2.7234	0.238519	0.1925	0.0007	0.0016	0.0002	5962.83	18.2354	1146.81	2.58835	7.71723	2.88337	78.334	4.84545	10.0038	0.913133	0.0005561	3e-07	1.00114	24.3518	5.464e-10	1.1864	ACS-2	sanidine	0.0054	0.00014	0.0121	2e-05	0	0	0.000702	1.2e-05	2e-05	1e-06	0.00027	0	263	2.32	0.227
	12A	20	2753.79	246.53	0.22	0.01	67.0792	2.70793	0.242612	0.248	0.001	0.0011	0.0002	4436.23	17.5708	1099.16	2.57069	9.12437	2.27619	87.7995	4.79607	5.44826	0.89009	0.0005561	3e-07	1.00114	24.3592	5.464e-10	1.1864	ACS-2	sanidine	0.0054	0.00014	0.0121	2e-05	0	0	0.000702	1.2e-05	2e-05	1e-06	0.00027	0	263	2.32	0.227
	14A	20	2279.06	88.34	0.381	0.01	66.7638	2.24081	0.0869141	0.2984	0.0007	0.00111	9e-05	11200.5	20.6514	3335.96	3.86377	37.4462	4.15954	154.949	4.01892	13.4277	0.968057	0.0005561	3e-07	1.00114	24.3842	5.464e-10	1.1864	ACS-2	sanidine	0.0054	0.00014	0.0121	2e-05	0	0	0.000702	1.2e-05	2e-05	1e-06	0.00027	0	263	2.32	0.227
	16A	20	2738.12	480.2	0.156	0.009	60.7013	2.69251	0.472551	0.226	0.002	0.0013	0.0004	2679.59	17.9155	604.577	2.07437	11.1819	3.70575	68.2327	3.72131	3.96703	0.953694	0.0005561	3e-07	1.00114	24.4093	5.464e-10	1.1864	ACS-2	sanidine	0.0054	0.00014	0.0121	2e-05	0	0	0.000702	1.2e-05	2e-05	1e-06	0.00027	0	263	2.32	0.227
	17A	20	2777.27	249.92	0.186	0.007	63.2541	2.73104	0.245943	0.2319	0.001	0.0012	0.0002	5054.51	17.7778	1171.25	2.62339	15.785	3.23052	111.249	3.99289	6.93382	0.961777	0.0005561	3e-07	1.00114	24.4167	5.464e-10	1.1864	ACS-2	sanidine	0.0054	0.00014	0.0121	2e-05	0	0	0.000702	1.2e-05	2e-05	1e-06	0.00027	0	263	2.32	0.227
	18A	20	2567.64	278.54	0.18	0.008	70.5318	2.52476	0.274078	0.28	0.001	0.001	0.0003	3775.46	16.9038	1055.28	2.59573	14.6996	2.48303	103.272	4.31197	4.38919	0.965826	0.0005561	3e-07	1.00114	24.4241	5.464e-10	1.1864	ACS-2	sanidine	0.0054	0.00014	0.0121	2e-05	0	0	0.000702	1.2e-05	2e-05	1e-06	0.00027	0	263	2.32	0.227
	20A	20	2530.76	431.07	0.21	0.01	63.5753	2.48846	0.424155	0.256	0.002	0.0012	0.0004	2643.73	17.0612	675.614	2.20435	9.29213	3.18963	56.2878	3.44222	3.58515	0.957332	0.0005561	3e-07	1.00114	24.4492	5.464e-10	1.1864	ACS-2	sanidine	0.0054	0.00014	0.0121	2e-05	0	0	0.000702	1.2e-05	2e-05	1e-06	0.00027	0	263	2.32	0.227
	21A	20	2617.97	198.2	0.123	0.004	37.0257	2.57428	0.195036	0.1439	0.0004	0.00211	9e-05	7537.62	13.6816	1085.19	2.70699	18.5793	2.65484	62.0645	2.22112	16.9043	0.705106	0.0005561	3e-07	1.00147	61.0764	5.464e-10	1.1864	ACS-2	sanidine	0.0054	0.00014	0.0121	2e-05	0	0	0.000702	1.2e-05	2e-05	1e-06	0.00027	0	263	2.32	0.227
	22A	20	2417.98	70.65	0.197	0.005	70.2071	2.37749	0.0695118	0.2958	0.0006	0.00099	7e-05	9819.96	14.0631	2900	3.75818	38.092	3.01118	103.751	2.38037	11.4607	0.671506	0.0005561	3e-07	1.00147	61.1263	5.464e-10	1.1864	ACS-2	sanidine	0.0054	0.00014	0.0121	2e-05	0	0	0.000702	1.2e-05	2e-05	1e-06	0.00027	0	263	2.32	0.227
X	24A	20	3197.05	538.73	0.28	0.06	14.523	3.14419	0.530286	0.0462	0.0002	0.00286	8e-05	8491.71	12.5882	392.072	1.99004	9.06811	2.54204	9.72112	2.06114	24.4651	0.693679	0.0005561	3e-07	1.00147	61.1902	5.464e-10	1.1864	ACS-2	sanidine	0.0054	0.00014	0.0121	2e-05	0	0	0.000702	1.2e-05	2e-05	1e-06	0.00027	0	263	2.32	0.227
X	25A	20	3009.18	166.52	0.35	0.04	62.4554	2.95927	0.163896	0.2113	0.0006	0.0013	0.0001	5237.26	11.6397	1104.64	2.32179	12.1441	2.74456	21.9423	2.16539	6.92802	0.603882	0.0005561	3e-07	1.00147	61.2089	5.464e-10	1.1864	ACS-2	sanidine	0.0054	0.00014	0.0121	2e-05	0	0	0.000702	1.2e-05	2e-05	1e-06	0.00027	0	263	2.32	0.227
	26A	20	2374.19	134.03	0.3	0.01	25.3643	2.33441	0.131873	0.1087	0.0002	0.0025	5e-05	18056	17.2149	1960.95	3.06276	33.9977	2.86583	46.2613	2.14916	45.8678	0.862197	0.0005561	3e-07	1.00147	61.2277	5.464e-10	1.1864	ACS-2	sanidine	0.0054	0.00014	0.0121	2e-05	0	0	0.000702	1.2e-05	2e-05	1e-06	0.00027	0	263	2.32	0.227
	27A	20	2446.87	68.61	0.191	0.004	64.1183	2.40592	0.0675111	0.2669	0.0006	0.0012	6e-05	12937.2	22.8187	3448.18	4.02959	43.9675	2.83601	126.795	2.95199	17.5856	0.77335	0.0005561	3e-07	1.00147	61.2945	5.464e-10	1.1864	ACS-2	sanidine	0.0054	0.00014	0.0121	2e-05	0	0	0.000702	1.2e-05	2e-05	1e-06	0.00027	0	263	2.32	0.227
	28A	20	2654.02	134.25	0.064	0.001	63.7735	2.60975	0.132106	0.2447	0.0006	0.0012	0.0001	7078.52	13.6795	1735.35	3.06314	24.9575	2.96027	189.552	3.32255	11.6986	0.761332	0.0005561	3e-07	1.00147	61.3133	5.464e-10	1.1864	ACS-2	sanidine	0.0054	0.00014	0.0121	2e-05	0	0	0.000702	1.2e-05	2e-05	1e-06	0.00027	0	263	2.32	0.227
	30A	20	2536.53	149.61	0.186	0.009	51.98	2.49414	0.147209	0.2086	0.0006	0.0016	0.0001	6800.06	12.8061	1417.4	2.6159	20.1959	2.24952	53.4409	2.62566	11.7988	0.695539	0.0005561	3e-07	1.00147	61.4296	5.464e-10	1.1864	ACS-2	sanidine	0.0054	0.00014	0.0121	2e-05	0	0	0.000702	1.2e-05	2e-05	1e-06	0.00027	0	263	2.32	0.227
X	31A	20	2859.83	211.7	0.139	0.007	43.857	2.81229	0.208339	0.1561	0.0005	0.0019	0.0001	6506.08	13.3797	1015.32	2.54341	21.2963	3.02547	51.1131	2.40743	13.0674	0.704827	0.0005561	3e-07	1.00147	61.4749	5.464e-10	1.1864	ACS-2	sanidine	0.0054	0.00014	0.0121	2e-05	0	0	0.000702	1.2e-05	2e-05	1e-06	0.00027	0	263	2.32	0.227
	32A	20	2649.72	101.05	0.166	0.003	34.0258	2.60552	0.0994356	0.1307	0.0002	0.00221	4e-05	22793.3	26.9373	2977.64	3.75931	48.5943	3.00164	125.57	2.60916	52.4011	0.984245	0.0005561	3e-07	1.00147	61.4937	5.464e-10	1.1864	ACS-2	sanidine	0.0054	0.00014	0.0121	2e-05	0	0	0.000702	1.2e-05	2e-05	1e-06	0.00027	0	263	2.32	0.227
Weighted mean K/Ca ±2σ					0.101515	0.030106
Weighted mean Age ±2σ			2476.03	68.263	n=17/25	MSWD=1.123
Notes:
1Corrected: Isotopic intensities corrected for blank, baseline, radioactive decay and detector intercalibration, not for interfering reactions.
X symbol preceding sample ID denotes analyses excluded from weighted-mean age calculations.
Errors quoted for individual analyses include analytical error only, without interfering reaction or J uncertainties.
Decay constants and isotopic abundances after Min et al. (2000)
Ages calculated relative to 1.1864 Ma ACS-2 Alder Creek sanidine standard (Jicha et al., 2016)
	Sample:	EXP2_1104-1103			Identifier:	UW153:E67
	Material:	feldspar			Location:
														Corrected1
	N	Power	Age	±1σ	K/Ca	±1σ	%40Ar	40Ar*/39ArK	±1σ	39Ar/40Ar	±1σ	36Ar/40Ar	±1σ	40Ar	±1σ	39Ar	±1σ	38Ar	±1σ	37Ar	±1σ	36Ar	±1σ	RunDate	Δt3	J	±1σ	39Ar Decay	37Ar Decay	LambdaK	MonitorAge	MonitorName	MonitorMaterial	(40Ar/3939)K	±1σ	(38Ar/3939)K	±1σ	(37Ar/3939)K	±1σ	(39Ar/3737)Ca	±1σ	(38Ar/3737)Ca	±1σ	(36Ar/3737)Ca	±1σ	(36Ar/3838)Cl	Ca/K	Cl/K
		%	(ka)	(ka)			(%)							(cps)		(cps)		(cps)		(cps)		(cps)			(days)
X	01A	20	16048.2	64.7465	21.4587	14.5857	74.6813	15.8384	0.0641807	0.047164	4.73457e-05	0.000847389	9.68468e-06	165462	110.986	7793.04	5.81681	118.409	5.30226	6.40781	4.35539	140.216	1.59894	2020-12-25 07:09:26	161.952	0.000556071	2.93131e-07	1.00114	24.4566	5.464e-10	1.1864	ACS-2	sanidine	0.0054	0.00014	0.0121	5e-05	0	0	0.000695	1.8e-05	1.96e-05	1.6e-06	0.000265	4e-06	263	2.32	0.227
	02A	20	1144.37	11.3574	78.8359	61.9529	83.2762	1.12482	0.0111669	0.743325	0.000698564	0.000548951	2.76312e-05	36056.9	30.1643	26664.4	10.8486	312.591	10.8351	5.96353	4.6864	19.7492	0.991651	2020-12-25 08:02:22	161.988	0.000556071	2.93131e-07	1.00115	24.4744	5.464e-10	1.1864	ACS-2	sanidine	0.0054	0.00014	0.0121	5e-05	0	0	0.000695	1.8e-05	1.96e-05	1.6e-06	0.000265	4e-06	263	2.32	0.227
X	03A	20	6245.15	8.39018	25.6904	4.06491	97.0277	6.14702	0.00827243	0.15798	0.000114861	9.6782e-05	3.64551e-06	279337	181.429	44042.1	14.2966	545.6	11.8383	30.2175	4.78115	27.2097	1.01677	2020-12-25 08:24:23	162.004	0.000556071	2.93131e-07	1.00115	24.4817	5.464e-10	1.1864	ACS-2	sanidine	0.0054	0.00014	0.0121	5e-05	0	0	0.000695	1.8e-05	1.96e-05	1.6e-06	0.000265	4e-06	263	2.32	0.227
	04A	20	1145.34	42.3438	24.5576	22.8298	82.0015	1.12577	0.0416334	0.73128	0.00156574	0.000591996	0.000101737	9509.63	18.8999	6919.01	5.30464	80.3894	5.37106	4.96465	4.6153	5.63854	0.963096	2020-12-25 08:46:23	162.019	0.000556071	2.93131e-07	1.00115	24.4891	5.464e-10	1.1864	ACS-2	sanidine	0.0054	0.00014	0.0121	5e-05	0	0	0.000695	1.8e-05	1.96e-05	1.6e-06	0.000265	4e-06	263	2.32	0.227
	05A	20	1119.27	19.6963	45.4854	34.6562	69.3669	1.10014	0.0193656	0.63268	0.00069074	0.00101809	4.08902e-05	25638.7	24.6729	16147.5	8.07303	198.332	6.84137	6.251	4.76273	26.0537	1.04398	2020-12-25 09:39:27	162.056	0.000556071	2.93131e-07	1.00115	24.507	5.464e-10	1.1864	ACS-2	sanidine	0.0054	0.00014	0.0121	5e-05	0	0	0.000695	1.8e-05	1.96e-05	1.6e-06	0.000265	4e-06	263	2.32	0.227
	06A	20	1108.12	35.0722	316.441	3055.98	70.8973	1.08917	0.0344831	0.653224	0.00108887	0.000966393	7.52637e-05	13162	19.868	8557.71	5.88002	95.0417	7.43287	0.476051	4.59739	12.6751	0.986445	2020-12-25 10:01:28	162.071	0.000556071	2.93131e-07	1.00115	24.5144	5.464e-10	1.1864	ACS-2	sanidine	0.0054	0.00014	0.0121	5e-05	0	0	0.000695	1.8e-05	1.96e-05	1.6e-06	0.000265	4e-06	263	2.32	0.227
	07A	20	1137.18	20.813	18.4427	6.27911	77.6838	1.11775	0.0204637	0.697619	0.000844026	0.00073766	4.7657e-05	21150.2	22.7899	14682.8	7.80034	170.319	5.94595	14.0099	4.76981	15.6313	1.0035	2020-12-25 10:23:35	162.087	0.000556071	2.93131e-07	1.00115	24.5218	5.464e-10	1.1864	ACS-2	sanidine	0.0054	0.00014	0.0121	5e-05	0	0	0.000695	1.8e-05	1.96e-05	1.6e-06	0.000265	4e-06	263	2.32	0.227
	08A	20	1152.57	81.607	0.928933	0.0583187	74.5465	1.13288	0.0802382	0.660371	0.00216301	0.00084364	0.000177168	5677.75	17.4493	3733.02	4.08541	39.8883	4.43185	70.6442	4.43296	5.23067	1.00174	2020-12-25 11:16:46	162.123	0.000556071	2.93131e-07	1.00115	24.5397	5.464e-10	1.1864	ACS-2	sanidine	0.0054	0.00014	0.0121	5e-05	0	0	0.000695	1.8e-05	1.96e-05	1.6e-06	0.000265	4e-06	263	2.32	0.227
	09A	20	1137.84	14.8598	9.62123	1.07794	79.3042	1.11839	0.0146104	0.711816	0.000720638	0.000682976	3.46789e-05	29392.7	26.125	20818.9	9.703	243.847	6.20131	38.0384	4.26159	20.2418	1.01481	2020-12-25 11:38:48	162.139	0.000556071	2.93131e-07	1.00115	24.5471	5.464e-10	1.1864	ACS-2	sanidine	0.0054	0.00014	0.0121	5e-05	0	0	0.000695	1.8e-05	1.96e-05	1.6e-06	0.000265	4e-06	263	2.32	0.227
	10A	20	1152.2	27.5511	5.49281	0.664508	71.8037	1.13252	0.027089	0.636195	0.00086873	0.000936146	5.75613e-05	17472.8	21.3416	11066	6.5657	135.702	6.29499	35.4037	4.28278	16.5311	1.00167	2020-12-25 12:00:50	162.154	0.000556071	2.93131e-07	1.00115	24.5545	5.464e-10	1.1864	ACS-2	sanidine	0.0054	0.00014	0.0121	5e-05	0	0	0.000695	1.8e-05	1.96e-05	1.6e-06	0.000265	4e-06	263	2.32	0.227
X	11A	20	6127.69	23.6593	6.89577	0.638562	93.9411	6.0312	0.0233258	0.15589	0.000139482	0.000200287	1.18213e-05	84699.2	58.4027	13178.1	7.49248	166.044	4.71466	33.5592	3.10746	17.1693	1.00008	2020-12-25 12:53:56	162.191	0.000556071	2.93131e-07	1.00115	24.5724	5.464e-10	1.1864	ACS-2	sanidine	0.0054	0.00014	0.0121	5e-05	0	0	0.000695	1.8e-05	1.96e-05	1.6e-06	0.000265	4e-06	263	2.32	0.227
X	12A	20	8491.8	63.9493	3.83358	0.712757	93.2049	8.36349	0.0631293	0.11151	0.000141788	0.000225716	2.32194e-05	41176.9	32.9294	4583.96	4.52561	56.7856	3.59325	20.991	3.90239	9.42527	0.95511	2020-12-25 13:15:54	162.206	0.000556071	2.93131e-07	1.00115	24.5798	5.464e-10	1.1864	ACS-2	sanidine	0.0054	0.00014	0.0121	5e-05	0	0	0.000695	1.8e-05	1.96e-05	1.6e-06	0.000265	4e-06	263	2.32	0.227
	13A	20	1231.08	36.8497	6.67397	1.23491	83.266	1.21008	0.0362332	0.69067	0.00126673	0.000550089	8.36075e-05	11243	18.8151	7727.81	5.61962	93.884	5.52625	20.3213	3.75994	6.29381	0.936074	2020-12-25 13:37:56	162.221	0.000556071	2.93131e-07	1.00115	24.5873	5.464e-10	1.1864	ACS-2	sanidine	0.0054	0.00014	0.0121	5e-05	0	0	0.000695	1.8e-05	1.96e-05	1.6e-06	0.000265	4e-06	263	2.32	0.227
	15A	20	1103.17	36.6858	11.0278	3.27787	72.5973	1.08431	0.0360694	0.671957	0.00121669	0.000909006	8.09789e-05	11722.7	19.2721	7839.89	5.77835	94.0881	4.52658	12.4603	3.70356	10.698	0.945336	2020-12-25 15:15:07	162.289	0.000556071	2.93131e-07	1.00115	24.6201	5.464e-10	1.1864	ACS-2	sanidine	0.0054	0.00014	0.0121	5e-05	0	0	0.000695	1.8e-05	1.96e-05	1.6e-06	0.000265	4e-06	263	2.32	0.227
	16A	20	1145.05	26.7807	10.9108	2.55862	79.3273	1.12549	0.0263314	0.707517	0.0010678	0.000682263	6.22093e-05	14905.1	20.3843	10493.7	6.47139	129.251	4.51873	16.8448	3.95003	10.2405	0.923191	2020-12-25 16:08:06	162.326	0.000556071	2.93131e-07	1.00115	24.6379	5.464e-10	1.1864	ACS-2	sanidine	0.0054	0.00014	0.0121	5e-05	0	0	0.000695	1.8e-05	1.96e-05	1.6e-06	0.000265	4e-06	263	2.32	0.227
	17A	20	1203.96	36.8187	3.8785	0.523807	80.2783	1.18341	0.0362022	0.680857	0.00124985	0.000650674	8.2345e-05	11460.7	19.1942	7766.24	5.65962	93.6674	5.13796	35.0581	4.7343	7.65836	0.939631	2020-12-25 16:30:02	162.341	0.000556071	2.93131e-07	1.00115	24.6454	5.464e-10	1.1864	ACS-2	sanidine	0.0054	0.00014	0.0121	5e-05	0	0	0.000695	1.8e-05	1.96e-05	1.6e-06	0.000265	4e-06	263	2.32	0.227
X	18A	20	5773.93	107.926	0.736745	0.0243017	35.3502	5.68246	0.106384	0.0622301	7.95904e-05	0.00216499	2.19499e-05	63165.9	44.3261	3926.6	4.19416	72.755	3.92574	93.2538	3.07313	137.317	1.38245	2020-12-25 16:51:59	162.356	0.000556071	2.93131e-07	1.00115	24.6528	5.464e-10	1.1864	ACS-2	sanidine	0.0054	0.00014	0.0121	5e-05	0	0	0.000695	1.8e-05	1.96e-05	1.6e-06	0.000265	4e-06	263	2.32	0.227
X	19A	20	12746.6	32.8986	-19.0706	6.83752	76.7237	12.5687	0.0325523	0.0610638	5.04946e-05	0.000778771	6.1179e-06	249684	163.657	15223.9	7.66687	208.97	5.8724	-13.9636	5.00655	194.288	1.52128	2020-12-25 17:45:00	162.393	0.000556071	2.93131e-07	1.00115	24.6707	5.464e-10	1.1864	ACS-2	sanidine	0.0054	0.00014	0.0121	5e-05	0	0	0.000695	1.8e-05	1.96e-05	1.6e-06	0.000265	4e-06	263	2.32	0.227
	21A	20	1214.91	62.3333	5.39964	1.75339	80.4647	1.19417	0.0612898	0.676271	0.00192918	0.000644476	0.000138521	6572.04	17.4702	4423.48	4.43002	47.9137	3.82045	14.32	4.64973	4.31205	0.906423	2020-12-25 18:28:59	162.424	0.000556071	2.93131e-07	1.00115	24.6856	5.464e-10	1.1864	ACS-2	sanidine	0.0054	0.00014	0.0121	5e-05	0	0	0.000695	1.8e-05	1.96e-05	1.6e-06	0.000265	4e-06	263	2.32	0.227
	22A	20	1157.7	17.3041	11.137	2.306	81.4088	1.13793	0.0170139	0.718188	0.000812945	0.000612122	4.07627e-05	23272.5	23.1013	16630.8	8.73684	204.8	7.39791	26.0845	5.40083	14.3615	0.944162	2020-12-25 19:22:12	162.461	0.000556071	2.93131e-07	1.00115	24.7036	5.464e-10	1.1864	ACS-2	sanidine	0.0054	0.00014	0.0121	5e-05	0	0	0.000695	1.8e-05	1.96e-05	1.6e-06	0.000265	4e-06	263	2.32	0.227
	23A	20	1157.94	18.183	7.12942	0.917027	80.8585	1.13817	0.017878	0.713165	0.00084319	0.000630697	4.25326e-05	22146.1	23.3678	15715.8	8.07291	196.858	7.70829	38.4932	4.95097	14.167	0.937582	2020-12-25 19:44:10	162.476	0.000556071	2.93131e-07	1.00115	24.7111	5.464e-10	1.1864	ACS-2	sanidine	0.0054	0.00014	0.0121	5e-05	0	0	0.000695	1.8e-05	1.96e-05	1.6e-06	0.000265	4e-06	263	2.32	0.227
X	24A	20	6158.86	48.8848	5.79463	1.10686	95.4973	6.06194	0.0481965	0.15767	0.000185009	0.000148091	2.51601e-05	36466.4	29.745	5738.47	4.83025	73.3813	5.37383	17.2877	3.302	5.50974	0.916402	2020-12-25 20:06:12	162.491	0.000556071	2.93131e-07	1.00115	24.7185	5.464e-10	1.1864	ACS-2	sanidine	0.0054	0.00014	0.0121	5e-05	0	0	0.000695	1.8e-05	1.96e-05	1.6e-06	0.000265	4e-06	263	2.32	0.227
	25A	20	1141.1	16.149	73.4282	72.3509	82.8199	1.1216	0.0158781	0.741365	0.000824273	0.000564327	3.92609e-05	23170.3	22.9287	17089.6	8.30865	198.047	5.9771	4.06011	4.00053	13.047	0.90554	2020-12-25 20:59:32	162.528	0.000556071	2.93131e-07	1.00115	24.7366	5.464e-10	1.1864	ACS-2	sanidine	0.0054	0.00014	0.0121	5e-05	0	0	0.000695	1.8e-05	1.96e-05	1.6e-06	0.000265	4e-06	263	2.32	0.227
X	26A	20	12190.2	47.0148	914.137	43072	96.4242	12.0182	0.0465059	0.0802667	8.55351e-05	0.00011837	1.20018e-05	78208.5	53.6951	6267.61	5.10286	77.7361	5.18032	0.119572	5.63395	9.25431	0.937438	2020-12-25 21:21:37	162.543	0.000556071	2.93131e-07	1.00115	24.7441	5.464e-10	1.1864	ACS-2	sanidine	0.0054	0.00014	0.0121	5e-05	0	0	0.000695	1.8e-05	1.96e-05	1.6e-06	0.000265	4e-06	263	2.32	0.227
	27A	20	1149.75	35.7379	38.9988	44.6252	75.6198	1.13011	0.0351384	0.671565	0.00118629	0.000807408	7.88392e-05	11760.7	18.6813	7860.55	5.91278	96.5755	5.3501	3.51403	4.02097	9.48429	0.923303	2020-12-25 21:43:38	162.559	0.000556071	2.93131e-07	1.00115	24.7516	5.464e-10	1.1864	ACS-2	sanidine	0.0054	0.00014	0.0121	5e-05	0	0	0.000695	1.8e-05	1.96e-05	1.6e-06	0.000265	4e-06	263	2.32	0.227
Weighted mean K/Ca ±2σ					1.08095	0.470683
Weighted mean Age ±2σ			1145.67	10.7804	n=17/25	MSWD=0.934
Notes:
1Corrected: Isotopic intensities corrected for blank, baseline, radioactive decay and detector intercalibration, not for interfering reactions.
3Time interval (days) between end of irradiation and beginning of analysis.
X symbol preceding sample ID denotes analyses excluded from weighted-mean age calculations.
Errors quoted for individual analyses include analytical error only, without interfering reaction or J uncertainties.
Decay constants and isotopic abundances after Min et al. (2000)
Ages calculated relative to 1.1864 Ma Alder Creek sanidine standard (Jicha et al., 2016)
